# Supplementary material for: Role of Homologous Recombination Repair (HRR) Genes in Uterine Leiomyosarcomas: A Retrospective Analysis
Source: MDPI journal article supplement (doi:10.3390/cancers14081934), 2022-04-12
Supplement: s1 [file s1]

# Supplementary Materials: The Role of Homologous Recombination Repair (HRR) Genes in Uterine Leiomyosarcomas: A Retrospective Analysis

Francesca Ciccarone, Matteo Bruno, Elisa De Paolis, Alessia Piermattei, Maria De Bonis, Domenica Lorusso, Gian Franco Zannoni, Nicola Normanno, Angelo Minucci, Giovanni Scambia and Gabriella Ferrandina

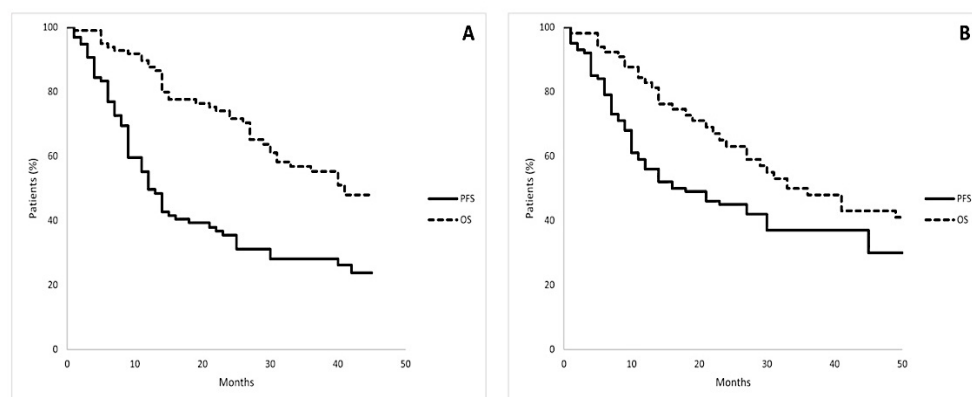

**Figure S1.** (A) PFS and OS in all patients (N = 105); (B) PFS and OS in patients with biopsy of tumor samples at primary diagnosis (N = 73);.

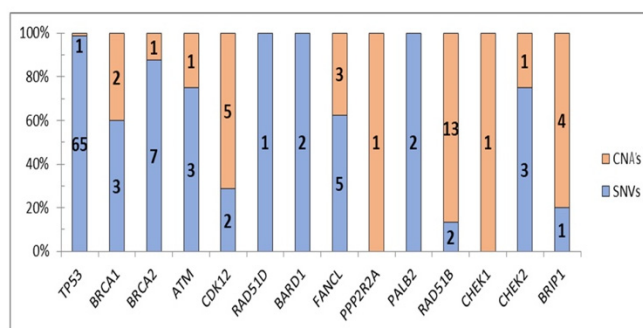

**Figure S2.** Single Nucleotide Variants (SNVs) and Copy Number Alterations (CNAs) distribution along the analyzed genes.

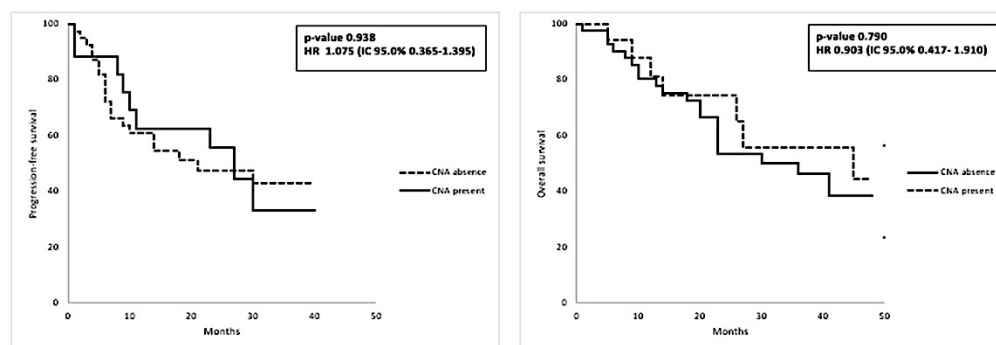

**Figure S3.** PFS and OS according to patients with CAN presence versus CAN absence.

**Table S1. Molecular alterations of uLMS.** The table shows the molecular alterations accounted in the uLMS, grouped by biopsy site. uLMS: uterine leiomyosarcomas; rs: reference SNP; VAF%: Variant Allele Frequency %; CNA: Copy Number Alteration.

| uLMS Group | ID Sample   | GENE | cDNA change                   | Aminoacid change | rs           | VAF% | CNA                       |
|------------|-------------|------|-------------------------------|------------------|--------------|------|---------------------------|
| PRIMARY    | uLMS001_P1  | TP53 | c.524G>A                      | p.Arg175His      | rs28934578   | 59%  |                           |
|            | uLMS002_P2  | TP53 | c.843_845del                  | p.Asp281_Thr284  | -            | 59%  |                           |
|            | uLMS003_P3  | TP53 | c.994-1G>C                    | p.?              | rs587782272  | 70%  |                           |
|            | uLMS004_P4  | TP53 | c.467G>C                      | p.Arg156Pro      | rs371524413  | 19%  |                           |
|            |             |      | c.713G>A                      | p.Cys238Tyr      | rs730882005  | 60%  |                           |
|            | uLMS005_P5  | TP53 | c.920-2A>G                    | p.?              | rs397516439  | 75%  |                           |
|            | uLMS006_P6  | TP53 | c.843C>G                      | p.Asp281Glu      | rs1057519984 | 82%  |                           |
|            | uLMS007_P7  | TP53 | c.786_801delTAATCTACTGG-GACGG | p.Asn263Thr*77   | -            | 48%  |                           |
|            | uLMS008_P8  | TP53 | c.376-2A>G                    | p.?              | rs786202799  | 31%  |                           |
|            |             |      | c.31G>A                       | p.Glu11Lys       | rs201382018  | 29%  |                           |
|            | uLMS009_P9  | TP53 | c.742C>T                      | p.Arg248Trp      | rs121912651  | 70%  |                           |
|            | uLMS010_P10 | TP53 | c.731G>A                      | p.Gly244Asp      | rs985033810  | 42%  |                           |
|            | uLMS011_P11 | TP53 | c.376T>G                      | p.Tyr126Asp      | rs886039483  | 56%  |                           |
|            | uLMS012_P12 | TP53 | c.374C>A                      | p.Thr125Lys      | rs786201057  | 35%  |                           |
|            | uLMS013_P13 | TP53 | c.745A>G                      | p.Arg249Gly      | rs587782082  | 93%  |                           |
|            | uLMS014_P14 | TP53 | c.569dupC                     | p.Pro191Serfs*18 | -            | 14%  |                           |
|            | uLMS015_P15 | TP53 | c.538G>A                      | p.Glu180Lys      | rs879253911  | 25%  |                           |
|            |             | TP53 | c.714dupT                     | p.Asn239*        | rs1567549651 | 52%  |                           |
|            | uLMS016_P16 | TP53 | c.230del                      | p.Pro77Glnfs*46  | -            | 20%  |                           |
|            |             |      | c.428T>C                      | p.Val143Ala      | rs1555526241 | 21%  |                           |
|            | uLMS017_P17 | TP53 | c.809T>C                      | p.Phe270Ser      | rs1057519986 | 48%  |                           |
|            | uLMS018_P18 | TP53 | c.461G>T                      | p.Gly154Val      | rs762846821  | 84%  |                           |
|            | uLMS019_P19 | TP53 | c.478del                      | p.Met160Trpfs*10 | -            | 37%  |                           |
|            | uLMS020_P20 | TP53 | c.809T>C                      | p.Phe270Ser      | rs1057519986 | 27%  | RAD51B - Exon 9 to 11 Del |
|            |             |      | c.626_627del                  | p.Arg209Lysfs*6  | rs1057517840 | 20%  |                           |
|            | uLMS021_P21 | TP53 | c.731G>A                      | p.Gly244Asp      | rs985033810  | 37%  | FANCL - Exon 8 to14 Del   |
|            |             |      | c.857A>G                      | p.Glu286Gly      | rs1057519985 | 33%  |                           |
|            | uLMS022_P22 | TP53 | c.420del                      | p.Cys141Alafs*29 | -            | 41%  | RAD51B - Exon 2 to 7 Ampl |
|            |             |      | c.396G>C                      | p.Lys132Asn      | rs866775781  | 39%  | CDK12 - Exon 3 to 8 Ampl  |
|            | uLMS023_P23 | TP53 | c.403_405delinsGG             | p.Cys135Glyfs*35 | rs1131691036 | 79%  | RAD51B - Exon 11 Ampl     |
|            | uLMS024_P24 | TP53 | c.374C>G                      | p.Thr125Arg      | rs786201057  | 84%  | BRIP1 - Exon 15           |

|                       |             |        |                    |                            |              |     |                                      |
|-----------------------|-------------|--------|--------------------|----------------------------|--------------|-----|--------------------------------------|
|                       |             |        |                    |                            |              |     | to 20<br>Ampl                        |
|                       | uLMS025_P25 | TP53   | c.329G>T           | p.Arg110Leu                | rs11540654   | 83% | RAD51B<br>- Exon 10<br>to 11<br>Ampl |
|                       | uLMS026_P26 | TP53   | c.1022del          | p.Phe341Serfs*4            | -            | 77% | CDK12 -<br>Exon 5 to<br>8 Ampl       |
|                       | uLMS027_P27 | TP53   | c.626_627del       | p.Arg209Lysfs*6            | rs1057517840 | 47% |                                      |
|                       |             |        | c.743G>A           | p.Arg248Gln                | rs11540652   | 26% |                                      |
|                       | uLMS028_P28 | BRCA2  | c.4854T>A          | p.Asp1618Glu               | rs80358708   | 13% |                                      |
|                       |             | PALB2  | c.3451C>T          | p.Leu1151Phe               | rs786203462  | 89% | BRCA2 -<br>Exon 2<br>Del             |
|                       |             | TP53   | c.646G>C           | p.Val216Leu                | rs730882025  | 79% |                                      |
|                       | uLMS029_P29 | TP53   | c.783-4_790del     | p.?                        | -            | 70% |                                      |
|                       |             | CDK12  | c.3814C>G          | p.Leu1272Val               | -            | 49% |                                      |
|                       | uLMS030_P30 | TP53   | c.626_627del       | p.Arg209Lysfs*6            | rs1057517840 | 78% |                                      |
|                       |             | RAD51D | c.287C>G           | p.Ala96Gly                 | rs1234250425 | 18% |                                      |
|                       | uLMS031_P31 | TP53   | c.856delGAinsTT    | p.Glu286Leu                | -            | 42% |                                      |
|                       |             | TP53   | c.818G>A           | p.Arg273His                | rs28934576   | 40% |                                      |
|                       |             | BRCA2  | c.644_646del       | p.Glu215del                | rs80359588   | 85% |                                      |
|                       | uLMS032_P32 | BRCA1  | c.1961dupA         | p.Tyr655Valfs*18           | rs80357522   | 73% |                                      |
|                       |             | TP53   | c.713G>A           | p.Cys238Tyr                | rs730882005  | 69% |                                      |
|                       |             | BRCA2  | c.7330G>T          | p.Asp2444Tyr               | rs398122579  | 45% |                                      |
|                       | uLMS033_P33 | TP53   | c.457_466delinsGGT | p.Pro153Glyfs*15           | -            | 46% |                                      |
|                       |             | BRCA1  | c.981_982del       | p.Thr327_Cys328in-<br>sTer | rs80357772   | 11% |                                      |
|                       | uLMS034_P34 | BRCA2  | c.6591_6592del     | p.Glu2198Asnfs*4           | rs80359605   | 58% |                                      |
|                       |             | ATM    | c.8773G>A          | p.Gly2925Ser               | rs876658519  | 60% |                                      |
|                       | uLMS035_P35 | RAD51B | c.728A>G           | p.Lys243Arg                | -            | 38% | BRCA1 -<br>Exon 10<br>to 13<br>Ampl  |
|                       | uLMS036_P36 | CDK12  | c.4390C>T          | p.Arg1464Trp               | -            | 46% |                                      |
|                       | uLMS037_P37 | BARD1  | c.282_291delinsT   | p.Leu95_Ile97del           | rs1064795485 | 39% |                                      |
|                       | uLMS038_P38 | FANCL  | c.1089dupA         | p.Cys374Mefs*5             | -            | 8%  |                                      |
|                       | uLMS039_P39 | BRCA2  | c.5286T>G          | p.Tyr1762Ter               | rs80358754   | 12% |                                      |
|                       | uLMS040_P40 | CHEK2  | c.721+3A>T         | p.?                        | rs587782849  | 43% | PPP2R2A<br>- Intron 1<br>to 9 Del    |
|                       | uLMS041_P41 | FANCL  | c.238C>G           | p.Leu80Val                 | rs563513081  | 40% |                                      |
| METASTATIC<br>DISEASE | uLMS042_R1  | TP53   | c.560-3T>G         | p.?                        | rs763746485  | 77% | BRIP1 -<br>Exon 5 to<br>16 Ampl      |
|                       | uLMS043_R2  | TP53   | c.626_627del       | p.Arg209Lysfs*6            | rs1057517840 | 60% |                                      |
|                       | uLMS044_R3  | TP53   | c.818G>T           | p.Arg273Leu                | rs28934576   | 66% |                                      |
|                       | uLMS045_R4  | TP53   | c.853G>A           | p.Glu285Lys                | rs112431538  | 45% |                                      |

|                                      |             |        |                                 |                 |              |     |                                                                                 |
|--------------------------------------|-------------|--------|---------------------------------|-----------------|--------------|-----|---------------------------------------------------------------------------------|
|                                      |             |        | c.589G>A                        | p.Val197Met     | rs786204041  | 43% |                                                                                 |
|                                      | uLMS046_R5  | TP53   | c.783-1G>T                      | p.?             | rs1555525367 | 53% | FANCL - Exon 1 to 7 Del                                                         |
|                                      |             |        | c.722C>T                        | p.Ser241Phe     | rs28934573   | 26% | RAD51B - Exon 8 to 11 Ampl                                                      |
|                                      | uLMS047_R6  | TP53   | c.522_540dup-CTCATGGTGGGGCAGCGC | p.Arg181Alafs*6 | -            | 58% |                                                                                 |
|                                      | uLMS048_R7  | TP53   | c.487T>A                        | p.Tyr163Asn     | rs786203436  | 62% |                                                                                 |
|                                      | uLMS049_R8  | TP53   | c.493C>T                        | p.Gln165*       | rs730882001  | 21% |                                                                                 |
|                                      | uLMS050_R9  | TP53   | c.711G>A                        | p.Met237Ile     | rs587782664  | 33% | RAD51B - Exon 8 to Intron 10 Del                                                |
|                                      |             |        | c.466C>G                        | p.Arg156Gly     | -            | 32% |                                                                                 |
|                                      | uLMS051_R10 | TP53   | c.376-1G>C                      | p.?             | -            | 89% |                                                                                 |
|                                      | uLMS052_R11 | BRCA1  | c.1703C>G                       | p.Pro568Arg     | rs80356910   | 43% | CHEK1 - Exons 4 to 11 Del; RAD51B - Exons 2 to 5 Del; CDK12 - Exons 2 to 13 Del |
|                                      |             | TP53   | c.749C>T                        | p.Pro250Leu     | rs1064794311 | 10% |                                                                                 |
|                                      | uLMS053_R12 | TP53   | c.404G>A                        | p.Cys135Tyr     | rs587781991  | 17% |                                                                                 |
|                                      |             | FANCL  | c.979C>G                        | p.Gln327Glu     | rs764186411  | 37% |                                                                                 |
|                                      | uLMS054_R13 | PALB2  | c.1368G>T                       | p.Glu456Asp     | rs1555461319 | 23% |                                                                                 |
|                                      | uLMS055_R14 | FANCL  | c.238C>G                        | p.Leu80Val      | rs563513081  | 41% |                                                                                 |
|                                      | uLMS056_R15 | BARD1  | c.1718T>C                       | p.Ile573Thr     | rs587780022  | 95% |                                                                                 |
|                                      | uLMS054_R16 | BRCA2  | c.2078G>A                       | p.Cys693Tyr     | rs771226774  | 64% |                                                                                 |
|                                      |             | BRIP1  | c.139C>G                        | p.Pro47Ala      | rs28903098   | 51% |                                                                                 |
|                                      |             | CHEK2  | c.475T>C                        | p.Tyr159His     | rs781254437  | 64% |                                                                                 |
|                                      | uLMS055_R17 | ATM    | c.483G>C                        | p.Gln161His     | rs864622742  | 5%  |                                                                                 |
|                                      | uLMS056_R18 | ATM    | c.2638+3A>G                     | p.?             | rs876660552  | 6%  |                                                                                 |
|                                      | uLMS057_R19 | FANCL  | c.2T>C                          | p.Met1?         | rs761291501  | 46% |                                                                                 |
|                                      |             | RAD51B | c.728A>G                        | p.Lys243Arg     | rs34594234   | 46% |                                                                                 |
| PRIMARY & MATCHED METASTATIC DISEASE | uLMS058_P42 | TP53   | c.658T>C                        | p.Thy220His     | rs530941076  | 13% |                                                                                 |
|                                      | uLMS058_R20 | TP53   | c.658T>C                        | p.Thy220His     | rs530941076  | 76% | CDK12 - Exon 1 to 5 Ampl                                                        |
|                                      | uLMS059_P43 | -      | -                               | -               | -            | -   |                                                                                 |
|                                      | uLMS059_R21 | TP53   | c.377A>G                        | p.Tyr126Cys     | rs1555526335 | 18% |                                                                                 |
|                                      | uLMS060_P44 | TP53   | c.538G>A                        | p.Glu180Lys     | rs879253911  | 81% |                                                                                 |
|                                      |             | CHEK2  | c.276dupC                       | p.Trp93Leufs*15 | rs876661156  | 8%  |                                                                                 |
|                                      | uLMS060_R22 | TP53   | c.538G>A                        | p.Glu180Lys     | rs879253911  | 85% |                                                                                 |

|  |             |       |           |               |             |     |                                                                       |
|--|-------------|-------|-----------|---------------|-------------|-----|-----------------------------------------------------------------------|
|  |             | TP53  | c.981T>G  | p.Tyr327*     | rs879254077 | 90% |                                                                       |
|  |             | BRCA2 | c.2489A>G | p.Asn830Ser   | rs786202809 | 40% |                                                                       |
|  | uLMS061_P45 | TP53  | c.818G>A  | p.Arg273His   | rs28934576  | 46% | RAD51B<br>- Exon 4<br>to 7<br>Ampl;<br>CDK12 -<br>Exon 3 to<br>8 Ampl |
|  | uLMS061_R23 | TP53  | c.818G>A  | p.Arg273His   | rs28934576  | 84% |                                                                       |
|  | uLMS062_P46 | TP53  | c.487T>A  | p.(Tyr163Asn) | rs786203436 | 53% |                                                                       |
|  | uLMS062_R24 | -     | -         | -             | -           | -   |                                                                       |
|  | uLMS063_P47 | TP53  | c.329G>T  | p.Arg110Leu   | rs11540654  | 27% | ATM -<br>Exon 23<br>to 24<br>Ampl                                     |
|  |             | TP53  | c.830G>A  | p.Cys277Tyr   | rs763098116 | 30% |                                                                       |
|  | uLMS063_R25 | -     | -         | -             | -           | -   |                                                                       |
